# Supplementary material for: The structure and function of the global citrus rhizosphere microbiome
Source: PubMed Central journal article supplement (PMC6244077; doi:10.1038/s41467-018-07343-2), 2018-11-20
Supplement: 41467_2018_7343_MOESM1_ESM.pdf [file 41467_2018_7343_MOESM1_ESM.pdf]

# **Supplementary Information**

## **The structure and function of the global citrus rhizosphere microbiome**

*Xu et al.*

**List of Content**

**Supplementary Figures 1-14**

**Supplementary Tables 1-5**

## Supplementary Figures

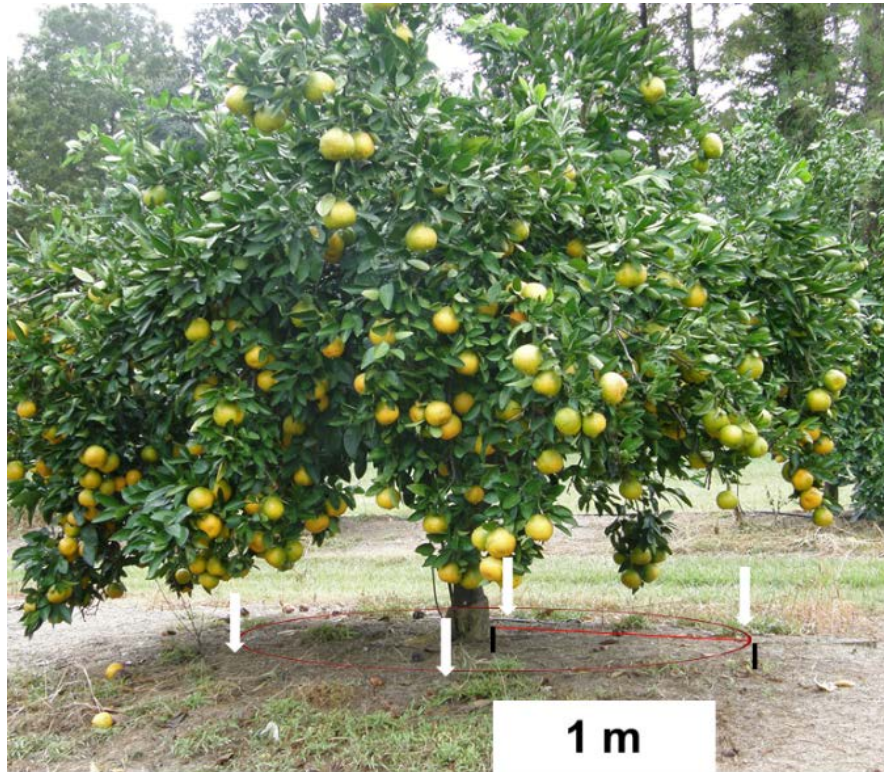

**Supplementary Figure 1. The sample collection approach used for collecting citrus rhizosphere microbes.** The samples were collected from four corners around 1 meter away from the trunk.

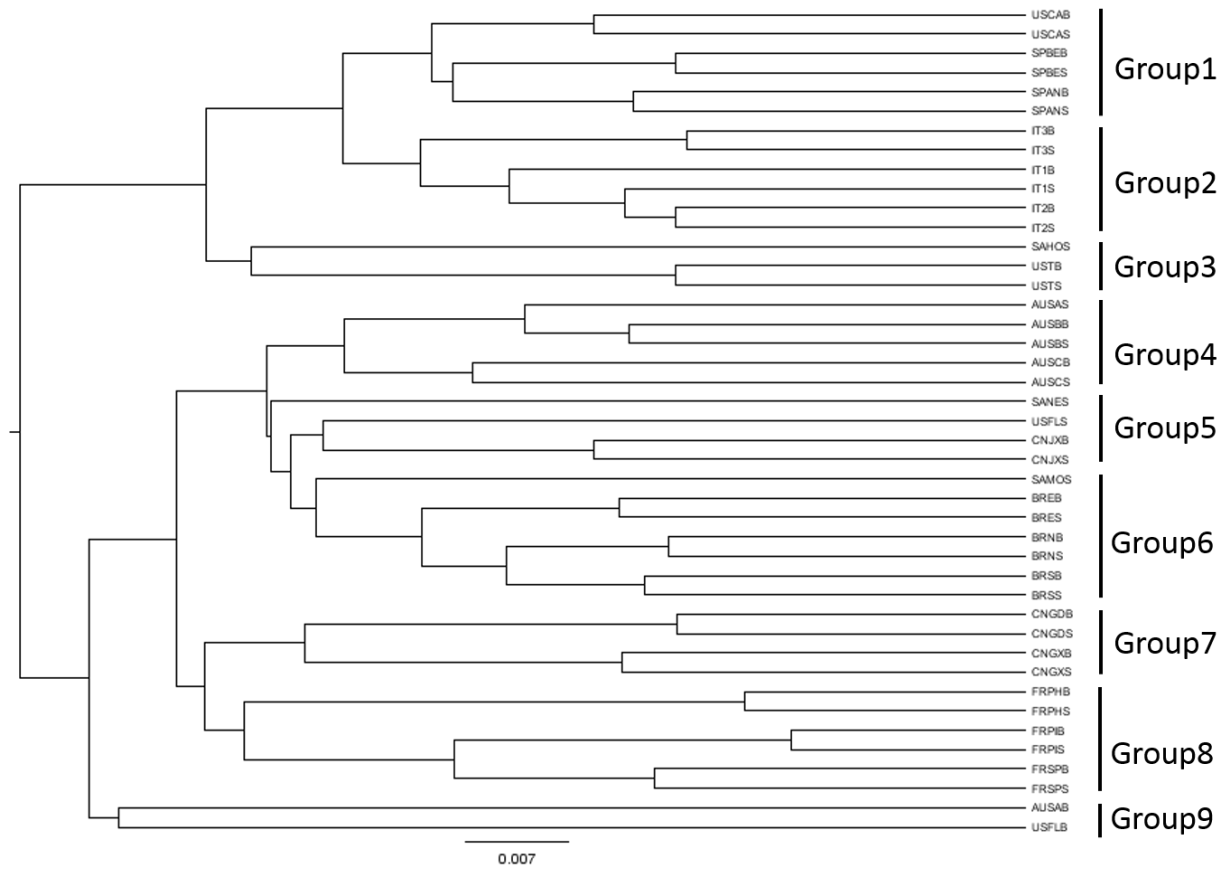

**Supplementary Figure 2. The microbial community similarity between samples estimated by Mash based on the metagenomic data.**

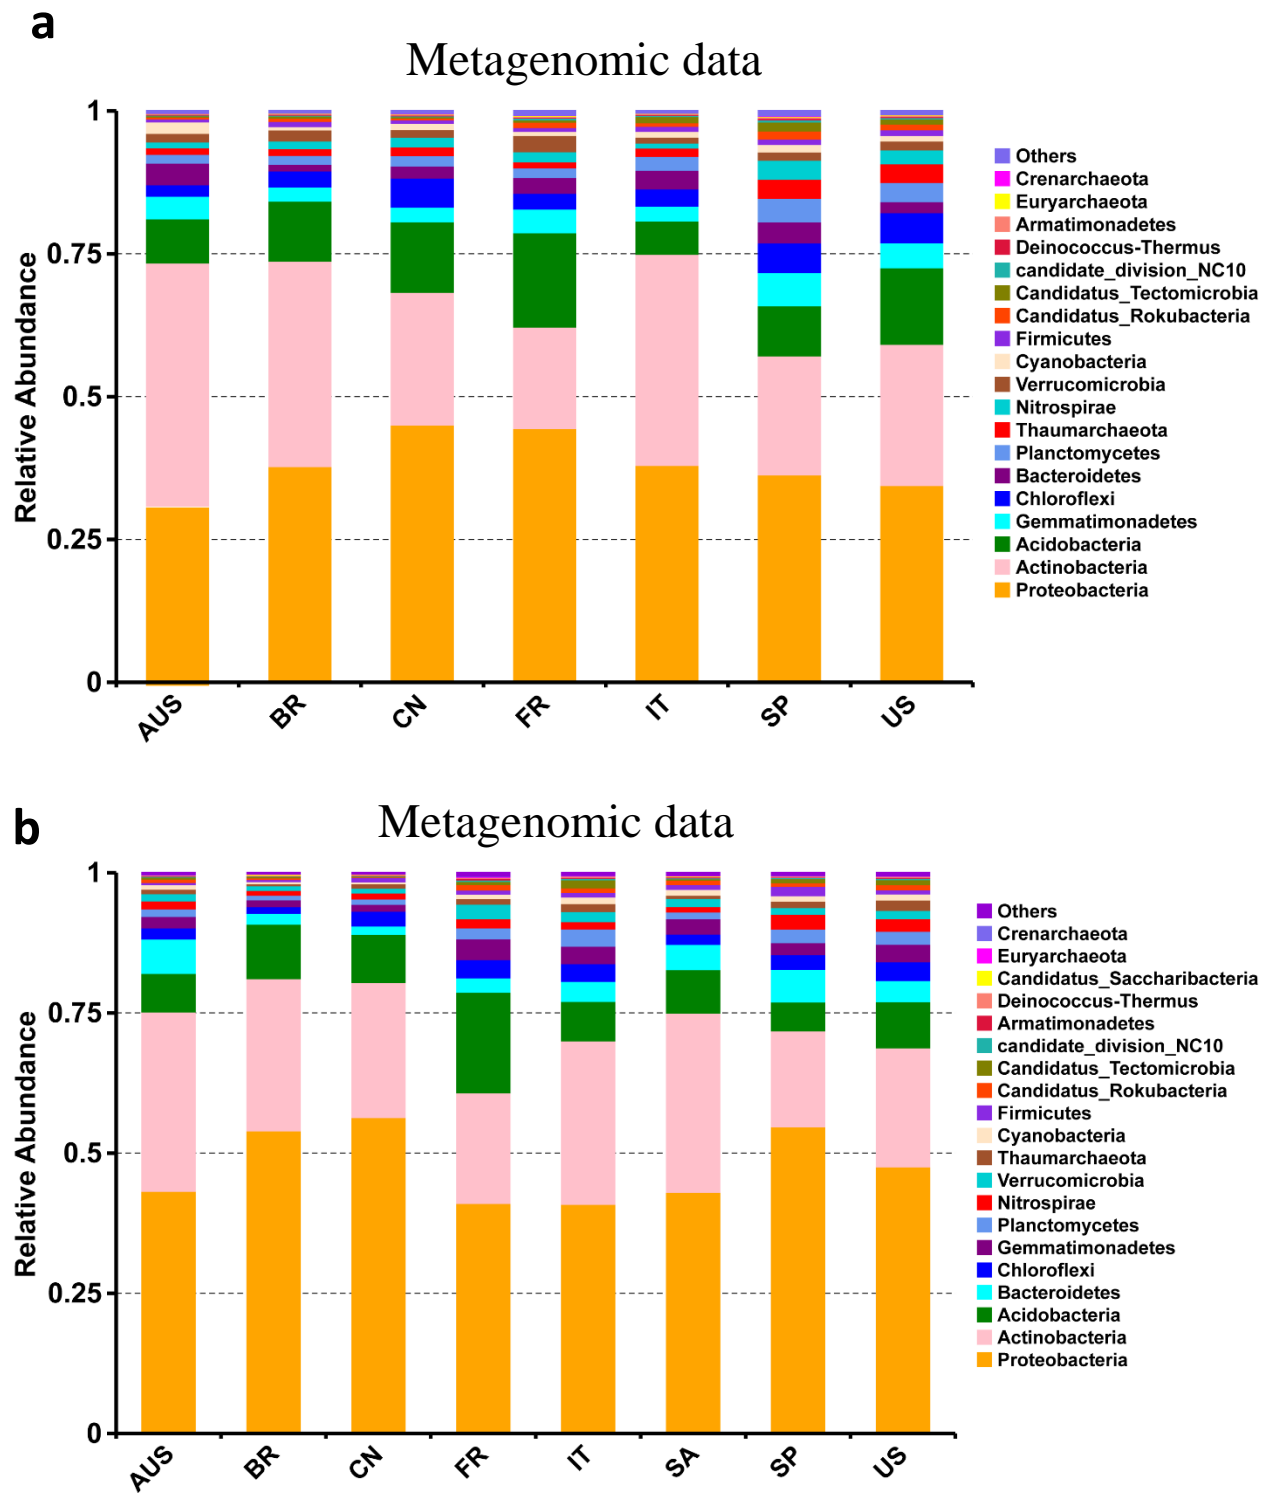

**Supplementary Figure 3. Taxonomic distributions of citrus-associated bulk soil and rhizosphere microbiomes across locations at prokaryotic phylum level.** (a) The distribution of bacterial and archaea at phylum level for bulk soil samples based on metagenomic data; (b) The distribution of bacterial and archaea at phylum level for rhizosphere samples based on metagenomic data. CN, China; SA, South Africa; BR, Brazil; SP, Spain; FR, French Réunion island; IT, Italy; AUS, Australia.

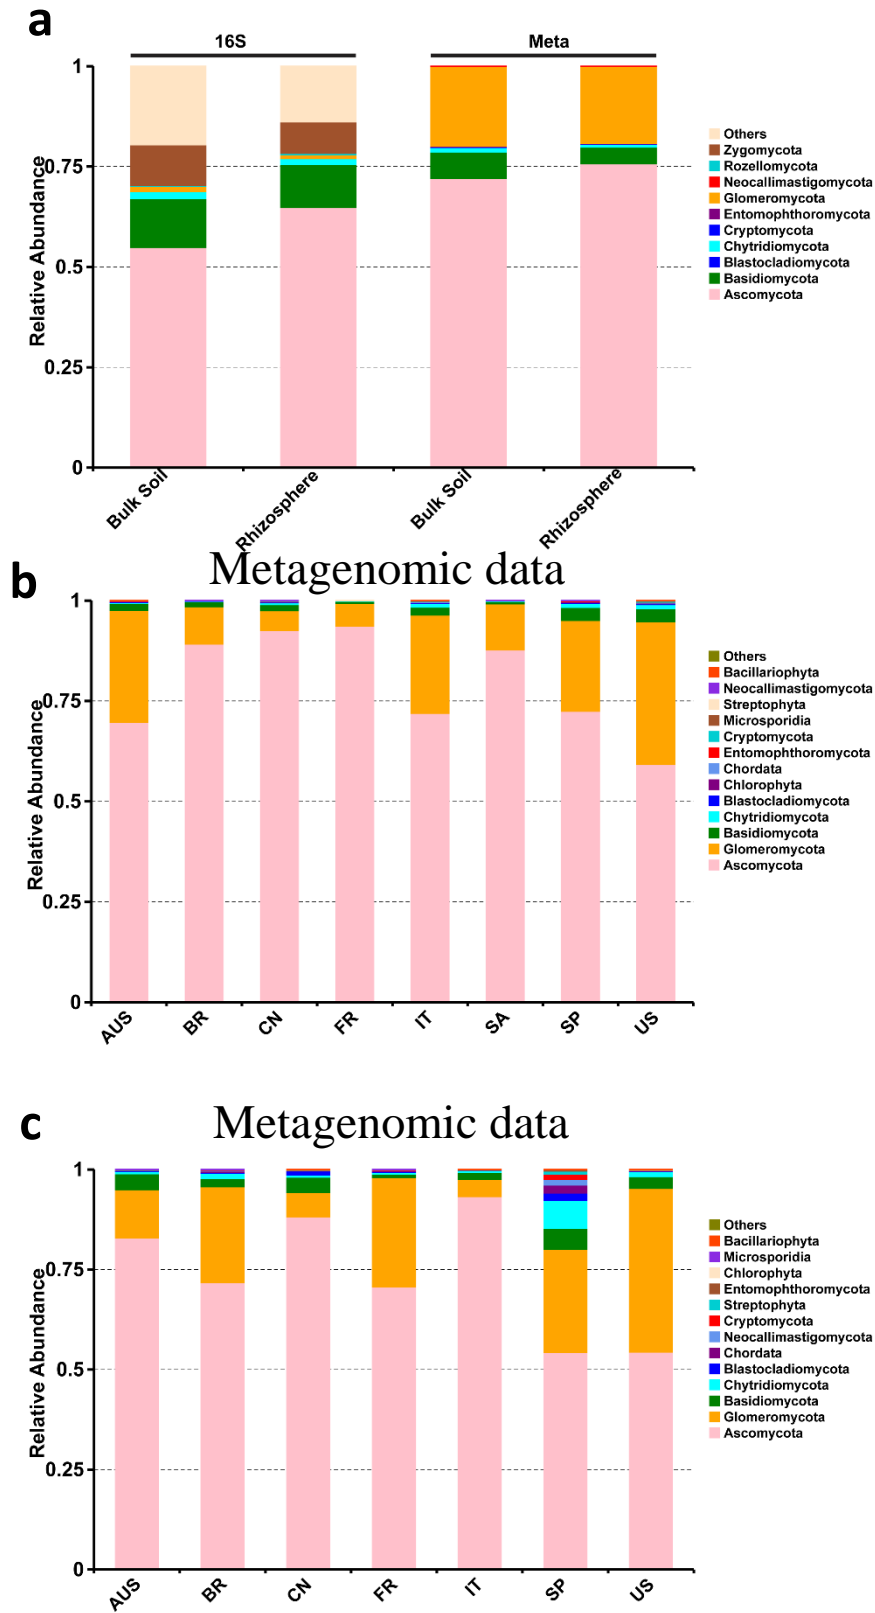

**Supplementary Figure 4. Taxonomic distributions of citrus rhizosphere and bulk soil microbiomes across locations at eukaryotic phylum level. (a) Eukaryotic phylum distribution**

between bulk soil and rhizosphere samples based on ITS2 and metagenomic data; (b) The distribution of eukaryotic microbes at phylum level for bulk soil samples based on metagenomic data; (c) The distribution of eukaryotic microbes at phylum level for rhizosphere samples based on metagenomic data. CN, China; SA, South Africa; BR, Brazil; SP, Spain; FR, French Réunion island; IT, Italy; AUS, Australia.

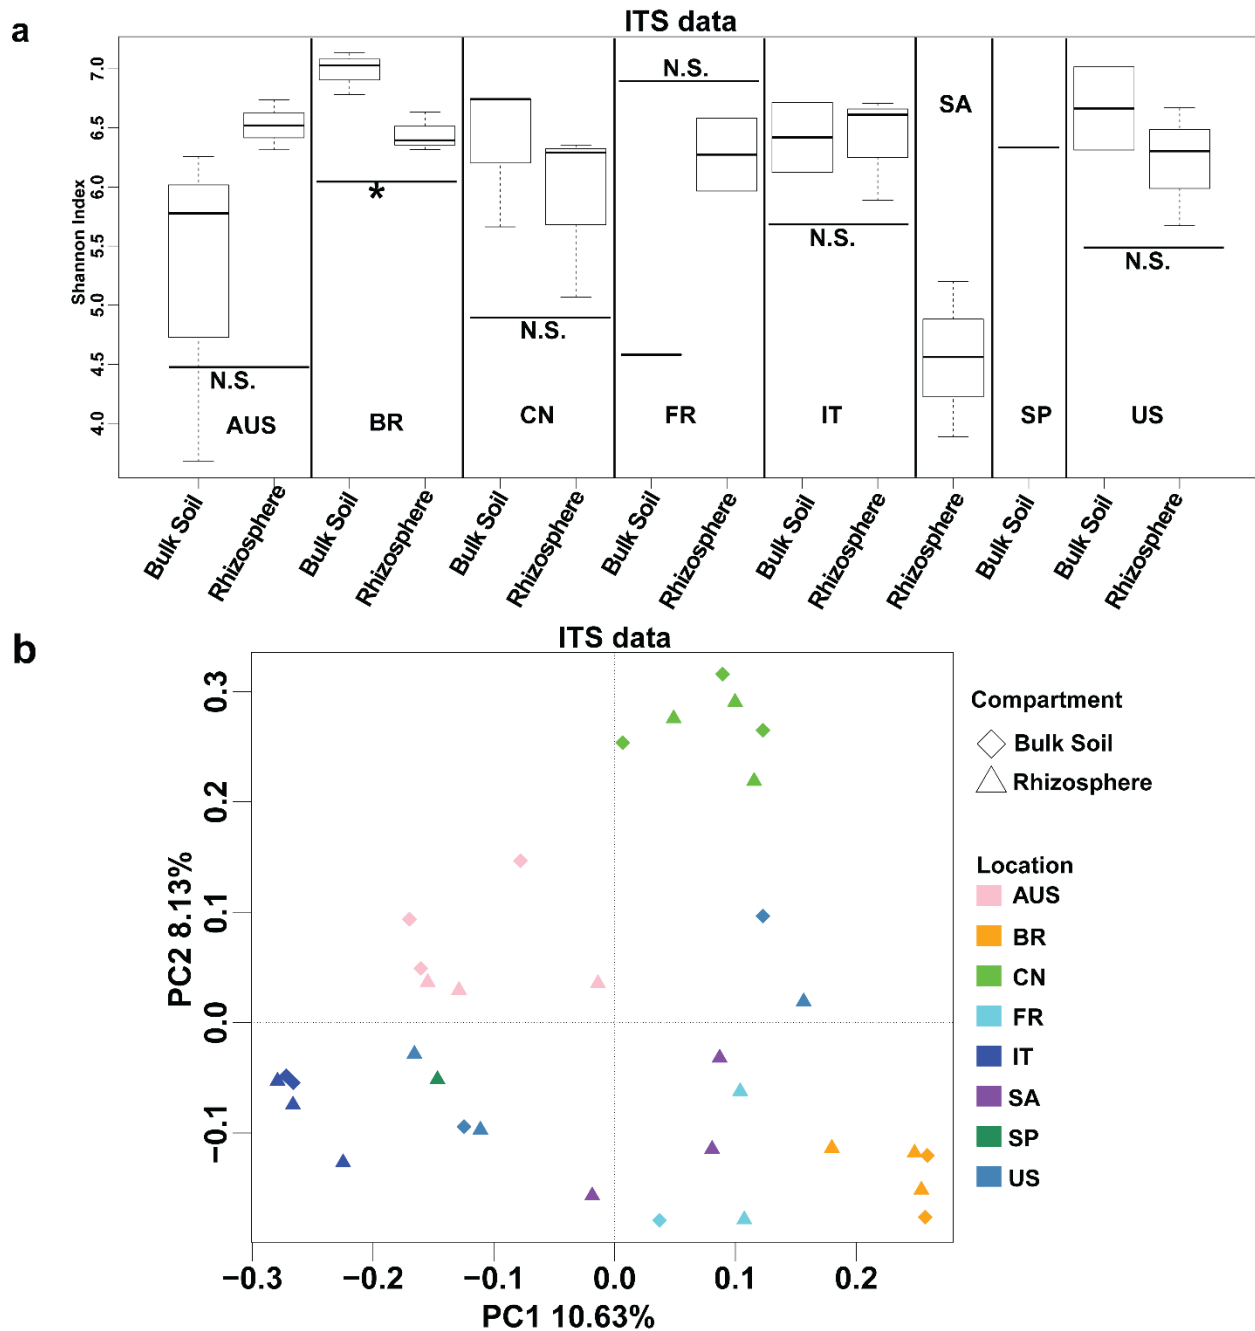

**Supplementary Figure 5. Alpha and beta diversity comparisons of citrus rhizosphere and bulk soil microbiomes across compartments based on ITS2 data.** (a) Alpha diversity comparison among bulk soil and rhizosphere for each location based on Shannon index; N.S., No significant, \*, P-value <0.05, one-sided t-test; center value represents the median of Shannon index; (b) PCoA based on the unweighted unifracs distance among bulk soil and rhizosphere samples for each location. CN, China; SA, South Africa; BR, Brazil; SP, Spain; FR, French Réunion island; IT, Italy; AUS, Australia.

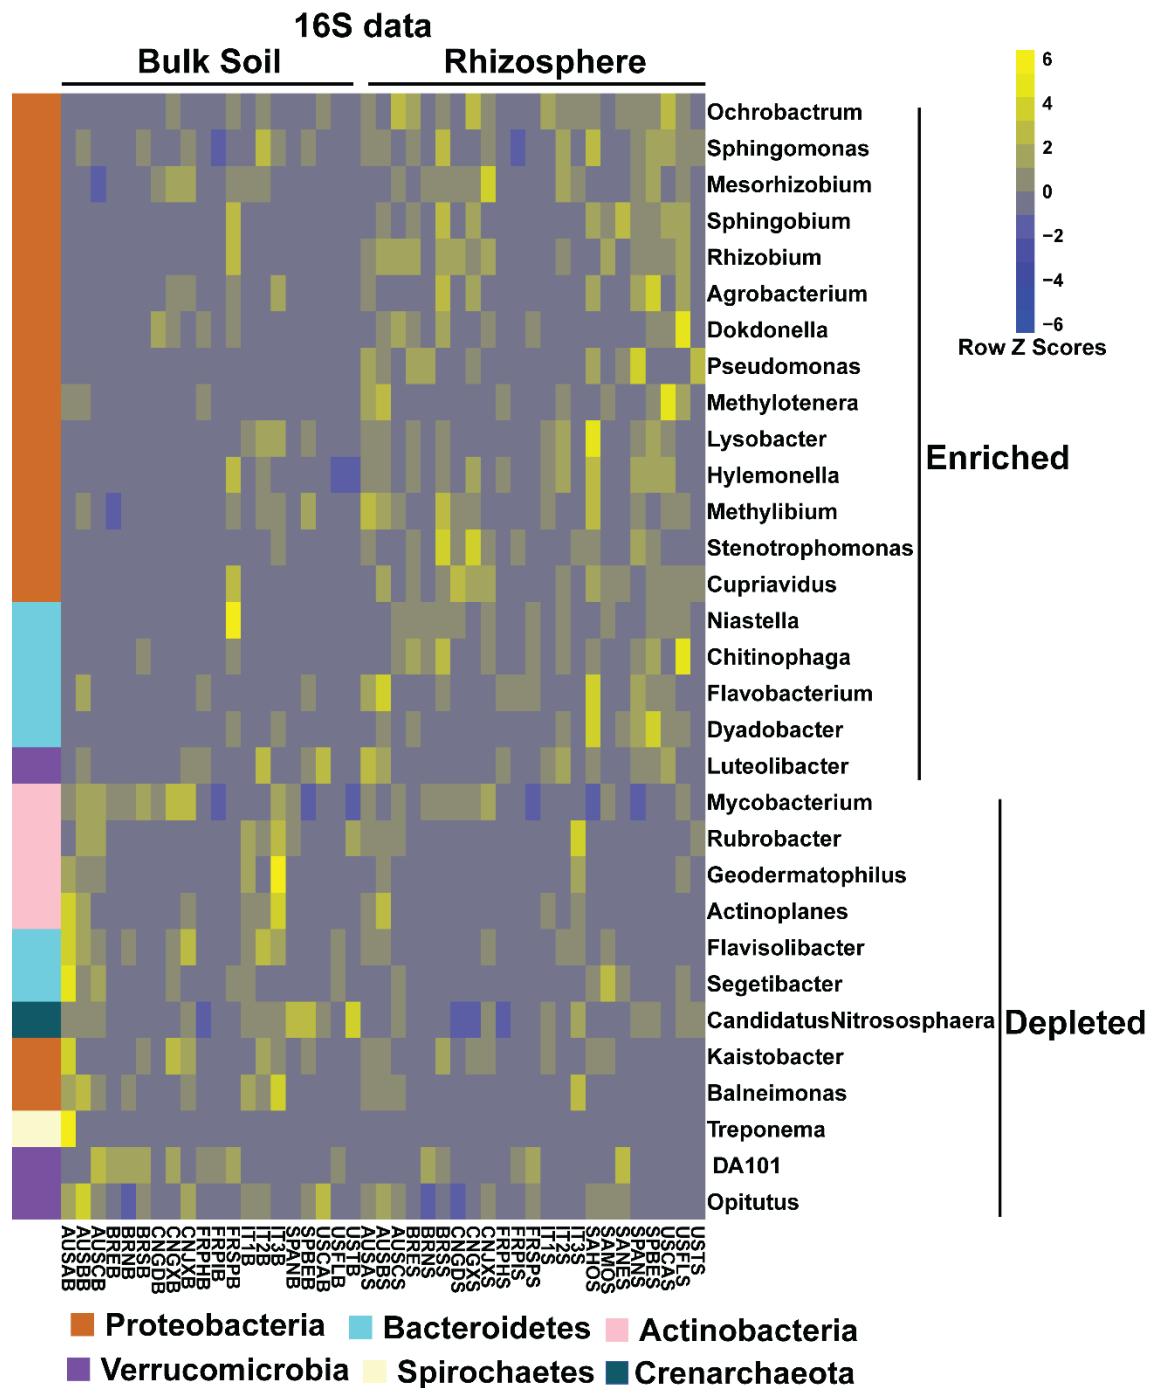

**Supplementary Figure 6. The rhizosphere-enriched and rhizosphere-depleted species at the genus level based on 16S data.** Scale, relative abundance of genus at row normalization by removing the mean (centering) and dividing by the standard deviation (scaling). The color from blue to yellow represents a relative abundance of each taxa from low to high.



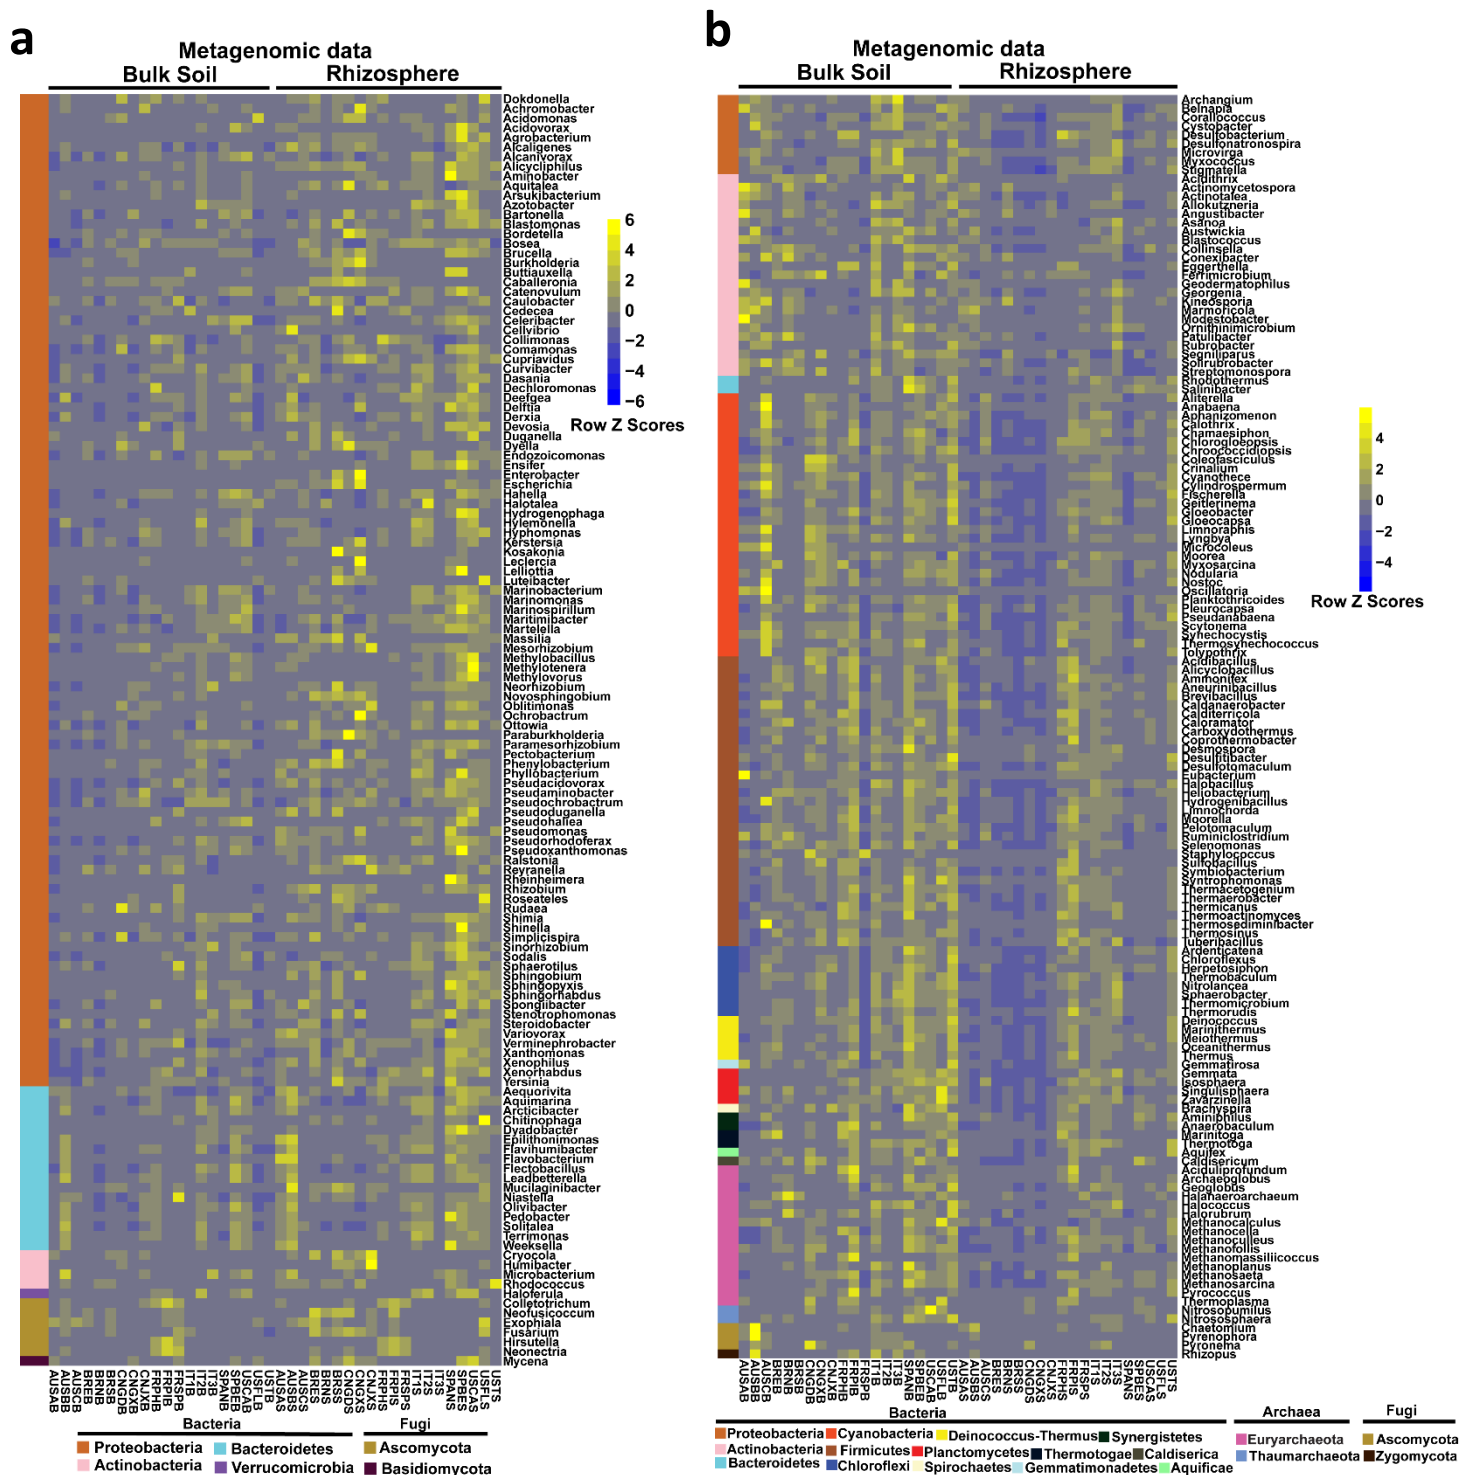

**Supplementary Figure 7. The rhizosphere-enriched and rhizosphere-depleted genera using metagenomic data.** (a) The relative abundance of rhizosphere-enriched genera. (b) The relative abundance of rhizosphere-depleted genera. Scale, relative abundance of genus at row normalization by removing the mean (centering) and dividing by the standard deviation (scaling). The color from blue to yellow represents a relative abundance of each taxa from low to high.

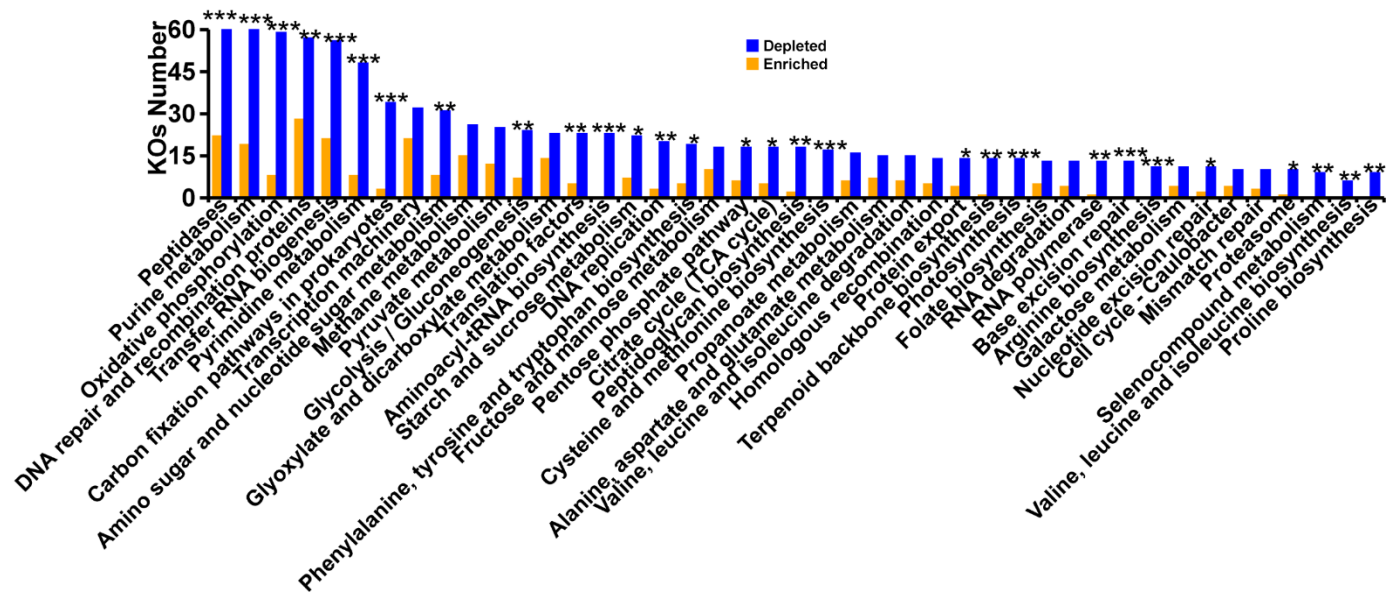

**Supplementary Figure 8. The distribution of universally depleted KOs for rhizosphere microbiome on KEGG level 3 pathway.** \*, adjust P-value <0.05; \*\*, adjust P-value <0.01; \*\*\*, adjust P-value <0.001; Fisher's exact test and adjust by BH method.







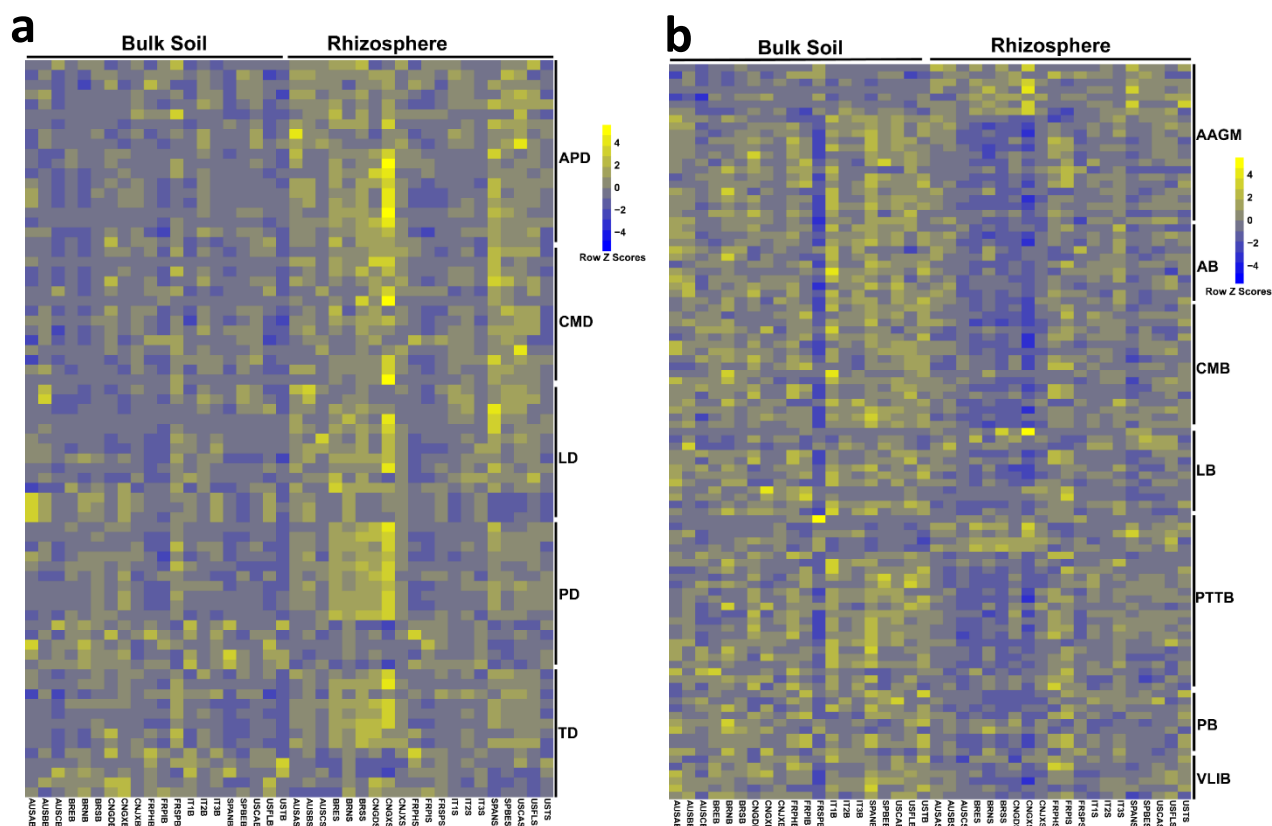

**Supplementary Figure 12. The relative abundance of core and universally depleted KOs for rhizosphere microbiome involved in amino acid degradation (a) and biosynthesis (b), respectively.** APD, arginine and proline degradation; CMD, cysteine and methionine degradation; LD, lysine degradation; PD, phenylalanine degradation; TD, tyrosine degradation. AAGM, alanine , aspartate and glutamate metabolism; AB, Arginine biosynthesis; CMB, cysteine and methionine biosynthesis; LB, lysine biosynthesis; PTTB, phenylalanine, tyrosine and tryptophan biosynthesis; PB, Proline biosynthesis; VLIB, Valine, leucine and isoleucine biosynthesis. Scale, relative abundance of KO at row normalization by removing the mean (centering) and dividing by the standard deviation (scaling). The color from blue to yellow represents a relative abundance of each KO from low to high.

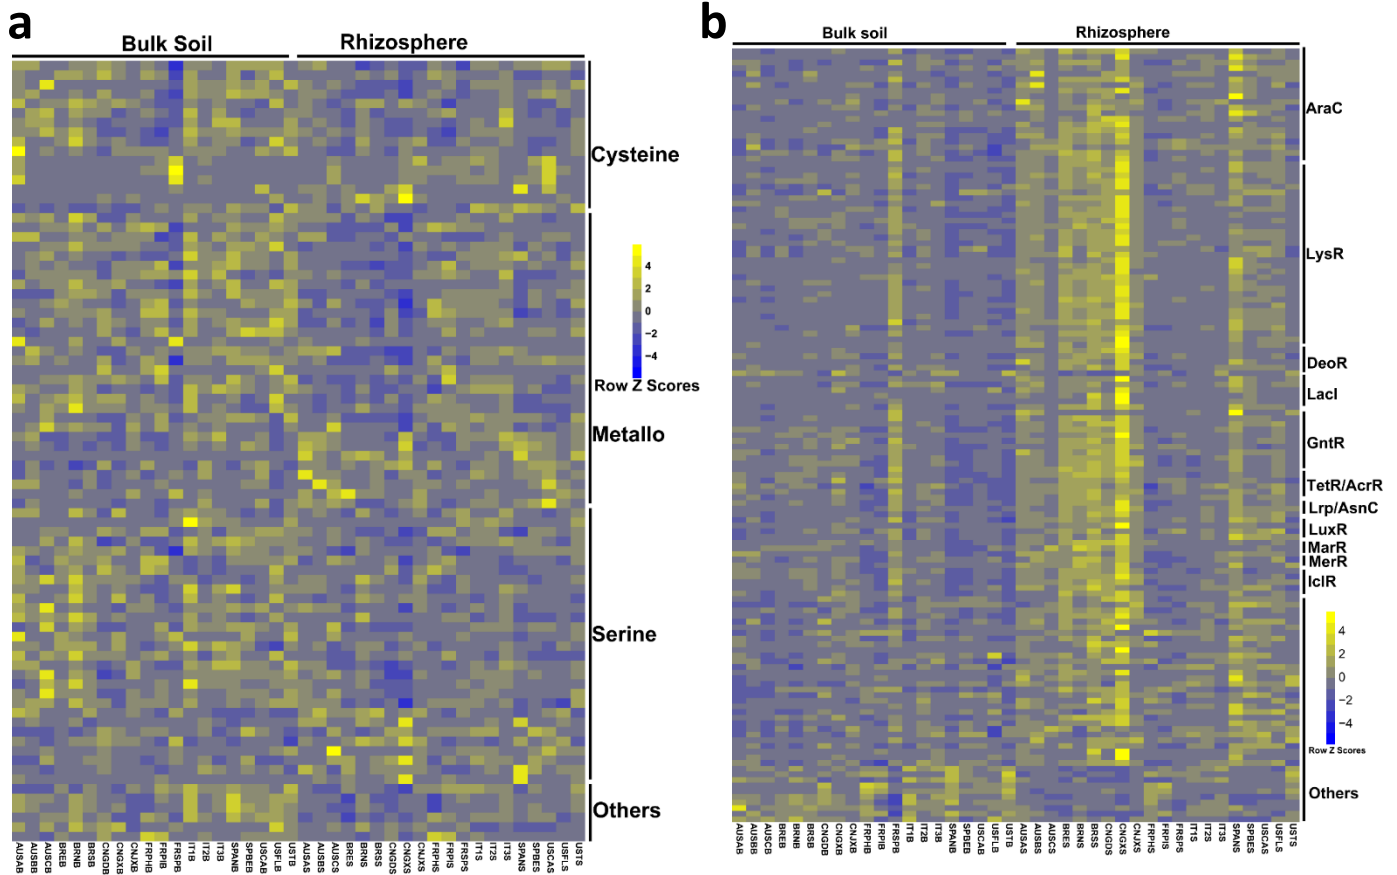

**Supplementary Figure 13. The relative abundance of core and universally depleted KOs for rhizosphere microbiome involved in peptidases (a) and transcription factors (b).** Scale, relative abundance of KO at row normalization by removing the mean (centering) and dividing by the standard deviation (scaling). The color from blue to yellow represents a relative abundance of each KO from low to high.

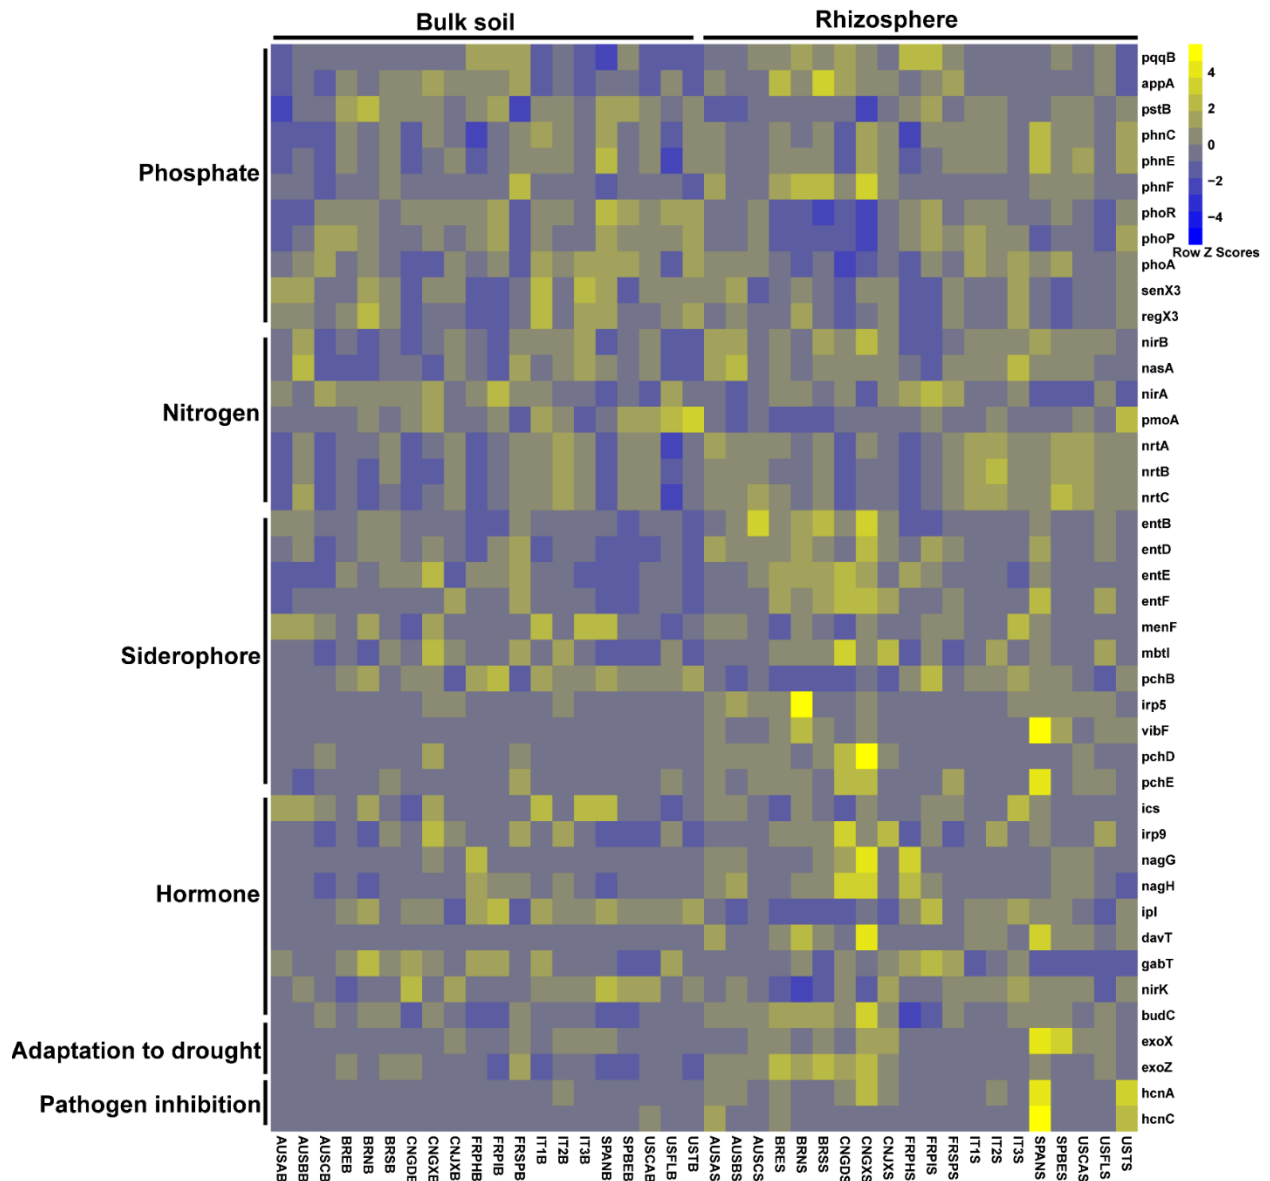

**Supplementary Figure 14. The relative abundance of core and universally depleted KOs for rhizosphere microbiome involved in plant nutrition promotion, plant hormone balance, adaptation to drought and pathogen inhibition.** Scale, relative abundance of KO at row normalization by removing the mean (centering) and dividing by the standard deviation (scaling). The color from blue to yellow represents a relative abundance of each KO from low to high.



## Supplementary Tables

**Supplementary Table 1. Summary of the rhizosphere soil and the corresponding bulk soil samples collected from citrus groves worldwide.**

| CODE  | LOCATION                           | LONGITUDE | LATITUDE | ROOTSTOCK           | SCION                 | AGE   | COUNTRY         | CONTINENT     |
|-------|------------------------------------|-----------|----------|---------------------|-----------------------|-------|-----------------|---------------|
| UST   | Weslaco, Texas                     | 97.96 W   | 26.17 N  | Sour orange         | Valencia sweet orange | 10    | United States   | North America |
| USCA  | Riverside, California              | 117.42 W  | 33.89 N  | Carrizo             | Washington Navel      | 23    | United States   | North America |
| USFL  | Lake Alfred, Florida               | 81.71 W   | 28.11 N  | Swingle             | Hamlin sweet orange   | 18    | United States   | North America |
| BRS   | South Sao Paulo                    | 48.32 W   | 23.61 S  | Rangpur lime        | Pera sweet orange     | NA    | Brazil          | South America |
| BRE   | East Sao Paulo                     | 47.03 W   | 22.38 S  | Rangpur lime        | Pera sweet orange     | NA    | Brazil          | South America |
| BRN   | North Sao Paulo                    | 49.25 W   | 20.52 S  | Rangpur lime        | Pera sweet orange     | NA    | Brazil          | South America |
| CNGX  | Guangxi                            | 108.18 E  | 23.07 N  | Poncirus trifoliata | Shatangju mandarin    | NA    | China           | Asia          |
| CNGD  | Guangdong                          | 112.82 E  | 23.64 N  | Poncirus trifoliata | Shatangju mandarin    | NA    | China           | Asia          |
| CNXX  | Jiangxi                            | 114.52 E  | 25.46 N  | Poncirus trifoliata | Newhall navel orange  | NA    | China           | Asia          |
| IT1   | calabria,Bovalino                  | 16.24 E   | 38.28 N  | Troyer citrange     | Tarocco               | 12    | Italy           | Europe        |
| IT2   | Sicily, Scordia                    | 14.88 E   | 37.28 N  | Troyer citrange     | Tarocco               | 10    | Italy           | Europe        |
| IT3   | Sicily, Paterno                    | 14.81 E   | 37.49 N  | Troyer citrange     | Tarocco               | 12    | Italy           | Europe        |
| SPBE  | Betera, Valencia                   | 0.36 W    | 39.58 N  | Carrizo             | lane-late             | 11    | Spain           | Europe        |
| SPAN  | Carmona, Sevilla, Andalusia        | 5.81 W    | 37.51 N  | Carrizo             | Delta Seedless        | 13    | Spain           | Europe        |
| AUSC  | Mundubbera, Queensland             | 151.30 E  | 25.59 S  | Swingle             | NA                    | 10-15 | Australia       | Oceania       |
| AUSB  | Griifith, NSW                      | 146.22 E  | 34.17 S  | Swingle             | NA                    | 10-15 | Australia       | Oceania       |
| AUSA  | Mildura, Victoria                  | 142.15 E  | 34.18 S  | Swingle             | NA                    | 10-15 | Australia       | Oceania       |
| SANE* | Nelspruit                          | 30.99 E   | 25.44 S  | Swingle             | Valencia sweet orange | 16    | South Africa    | Africa        |
| SAHO* | Hoedspruit                         | 30.72 E   | 24.36 S  | Swingle             | Valencia sweet orange | 9     | South Africa    | Africa        |
| SAMO* | Mooinooi                           | 27.61 E   | 25.77 S  | Swingle             | Valencia sweet orange |       | South Africa    | Africa        |
| FRSP  | Le Guillaume                       | 55.57 E   | 21.35 S  | tangor ortanique#   |                       | 15    | Réunion, France | Africa        |
| FRPI  | Petite ile, Chemin Jessy           | 55.56 E   | 21.34 S  | tangor ortanique#   |                       | 20    | Réunion, France | Africa        |
| FRPH  | Plaine des cafres, Piton Hyacinthe | 55.53 E   | 21.2 S   | tangor ortanique#   |                       | 8     | Réunion, France | Africa        |

Note: NA, the information was not available. \*, only rhizosphere soil samples were collected. For other sites, both rhizosphere and bulk soil samples were collected. #, the trees were from seedlings, not from grafting.

**Supplementary Table 2. Summary of the 16S reads**

| <b>Bulk soil</b> | <b>High quality Tag</b> | <b>Clean Tag</b> | <b>OTU</b> | <b>Rhizosphere</b> | <b>High quality Tag</b> | <b>Clean Tag</b> | <b>OTU</b> |
|------------------|-------------------------|------------------|------------|--------------------|-------------------------|------------------|------------|
| AUSAB            | 29,130                  | 21,494           | 2126       | AUSAS              | 27,837                  | 21,361           | 2438       |
| AUSBB            | 29,751                  | 23,071           | 2702       | AUSBS              | 28,639                  | 22,642           | 2508       |
| AUSCB            | 30,598                  | 23,459           | 2356       | AUSCS              | 30,171                  | 22,807           | 2783       |
| BREB             | 30,041                  | 22,289           | 2942       | BRES               | 28,835                  | 22,814           | 2767       |
| BRNB             | 29,214                  | 23,171           | 2623       | BRNS               | 30,035                  | 26,362           | 2533       |
| BRSB             | 29,552                  | 21,849           | 3037       | BRSS               | 28,535                  | 23,911           | 2454       |
| CNGDB            | 30,234                  | 21,674           | 2865       | CNGDS              | 29,221                  | 21,747           | 2417       |
| CNGXB            | 29,885                  | 22,703           | 2817       | CNGXS              | 26,753                  | 22,805           | 1829       |
| CNJXB            | 29,652                  | 22,421           | 2950       | CNJXS              | 29,406                  | 22,330           | 2825       |
| FRPHB            | 30,333                  | 22,910           | 2823       | FRPHS              | 30,314                  | 22,517           | 2599       |
| FRPIB            | 30,501                  | 23,100           | 2514       | FRPIS              | 30,055                  | 22,877           | 2604       |
| FRSPB            | 31,088                  | 6,699            | 1361       | FRSPS              | 30,778                  | 15,557           | 2238       |
| IT1B             | 29,870                  | 22,243           | 2570       | IT1S               | 29,938                  | 21,744           | 2788       |
| IT2B             | 29,456                  | 22,486           | 2863       | IT2S               | 29,781                  | 22,542           | 2749       |
| IT3B             | 29,133                  | 22,933           | 2159       | IT3S               | 29,694                  | 22,971           | 2307       |
| SPANB            | 30,825                  | 23,754           | 2330       | SPANS              | 28,096                  | 24,952           | 1704       |
| SPBEB            | 30,897                  | 24,331           | 2940       | SPBES              | 28,755                  | 23,173           | 2471       |
| USCAB            | 30,387                  | 22,536           | 3211       | USCAS              | 29,960                  | 23,098           | 3184       |
| USFLB            | 29,986                  | 23,049           | 2123       | USFLS              | 29,652                  | 22,565           | 3176       |
| USTB             | 30,629                  | 22,667           | 2242       | USTS               | 29,628                  | 23,865           | 2331       |
|                  |                         |                  |            | SAHOS              | 29,874                  | 24,437           | 2239       |
|                  |                         |                  |            | SAMOS              | 28,818                  | 22,536           | 2313       |
|                  |                         |                  |            | SANES              | 30,297                  | 23,129           | 3256       |

**Supplementary Table 3. Summary of the ITS reads**

| <b>Bulk soil</b> | <b>High quality Tag</b> | <b>Clean Tag</b> | <b>OTU</b> | <b>Rhizosphere</b> | <b>High quality Tag</b> | <b>Clean Tag</b> | <b>OTU</b> |
|------------------|-------------------------|------------------|------------|--------------------|-------------------------|------------------|------------|
| AUSAB            | 24152                   | 23748            | 409        | AUSAS              | 23894                   | 23392            | 754        |
| AUSBB            | 22615                   | 22125            | 499        | AUSBS              | 23394                   | 22964            | 627        |
| AUSCB            | 24418                   | 23870            | 627        | AUSCS              | 24236                   | 23774            | 592        |
| BREB             | 22583                   | 21919            | 932        | BRES               | 23887                   | 23301            | 992        |
| BRNB             | 23592                   | 22862            | 811        | BRNS               | 24861                   | 24616            | 588        |
| BRSB             | 20464                   | 19820            | 936        | BRSS               | 24602                   | 23773            | 838        |
| CNGDB            | 23222                   | 21816            | 722        | CNGDS              | 22440                   | 21662            | 722        |
| CNGXB            | 23916                   | 23248            | 789        | CNGXS              | 22992                   | 22657            | 550        |
| CNJXB            | 23560                   | 22178            | 581        | CNJXS              | 24216                   | 23254            | 771        |
| FRSPB            | 6376                    | 5943             | 329        | FRPIS              | 24167                   | 23782            | 722        |
| IT2B             | 23578                   | 23215            | 635        | FRSPS              | 10487                   | 10113            | 571        |
| IT3B             | 23918                   | 23443            | 516        | IT1S               | 19224                   | 18931            | 644        |
| USFLB            | 23384                   | 22678            | 813        | IT2S               | 21825                   | 21287            | 699        |
| USTB             | 24844                   | 24458            | 416        | IT3S               | 22939                   | 22469            | 545        |
|                  |                         |                  |            | SAHOS              | 24920                   | 24779            | 280        |
|                  |                         |                  |            | SAMOS              | 24530                   | 24028            | 378        |
|                  |                         |                  |            | SANES              | 24371                   | 24165            | 497        |
|                  |                         |                  |            | SPBES              | 24445                   | 24217            | 541        |
|                  |                         |                  |            | USCAS              | 23717                   | 23135            | 606        |
|                  |                         |                  |            | USFLS              | 23826                   | 23195            | 810        |
|                  |                         |                  |            | USTS               | 24489                   | 24168            | 521        |

**Supplementary Table 4. Summary of the metagenomic reads**

| <b>Bulk soil</b> | <b>clean reads</b> | <b>sickle treated paired</b> | <b>sickle treated sington</b> | <b>sickle/clean</b> | <b>overall citrus mapping rate*</b> | <b>Rhizosphere</b> | <b>clean reads</b> | <b>sickle treated paired</b> | <b>sickle treated sington</b> | <b>sickle/clean</b> | <b>overall citrus mapping rate*</b> |
|------------------|--------------------|------------------------------|-------------------------------|---------------------|-------------------------------------|--------------------|--------------------|------------------------------|-------------------------------|---------------------|-------------------------------------|
| AUSAB            | 232421170          | 105656155                    | 9900741                       | 95.18%              | 0.07%                               | AUSAS              | 230361260          | 108967417                    | 5938730                       | 97.18%              | 0.10%                               |
| AUSBB            | 232697748          | 106703069                    | 9131998                       | 95.63%              | 0.03%                               | AUSBS              | 230919620          | 109765837                    | 5443449                       | 97.43%              | 0.16%                               |
| AUSCB            | 231774200          | 105749995                    | 9553184                       | 95.37%              | 0.03%                               | AUSCS              | 231469610          | 110106009                    | 5380639                       | 97.46%              | 0.08%                               |
| BREB             | 233035348          | 109912409                    | 6289030                       | 97.03%              | 0.18%                               | BRES               | 232359704          | 109370344                    | 6498066                       | 96.94%              | 1.35%                               |
| BRNB             | 232506112          | 109634384                    | 6299626                       | 97.02%              | 0.08%                               | BRNS               | 231285736          | 109143621                    | 6197083                       | 97.06%              | 1.32%                               |
| BRSB             | 232693870          | 106610059                    | 9130025                       | 95.55%              | 0.44%                               | BRSS               | 232193680          | 109377795                    | 6415041                       | 96.98%              | 0.60%                               |
| CNGDB            | 229998952          | 107091627                    | 7544882                       | 96.40%              | 0.04%                               | CNGDS              | 231718448          | 105373714                    | 9433423                       | 95.02%              | 1.99%                               |
| CNGXB            | 231108704          | 107314424                    | 7877955                       | 96.28%              | 0.05%                               | CNGXS              | 231704742          | 109518555                    | 6029448                       | 97.14%              | 0.22%                               |
| CNJXB            | 231308036          | 107560506                    | 7685753                       | 96.32%              | 0.05%                               | CNJXS              | 232280492          | 105175655                    | 9780091                       | 94.77%              | 0.33%                               |
| FRPHB            | 232413558          | 107814480                    | 8015428                       | 96.23%              | 0.03%                               | FRPHS              | 230572604          | 107310508                    | 7532205                       | 96.35%              | 0.10%                               |
| FRPIB            | 232402148          | 107980913                    | 7840207                       | 96.30%              | 0.03%                               | FRPIS              | 230632756          | 107844795                    | 7082604                       | 96.59%              | 0.12%                               |
| FRSPB            | 231798562          | 107277214                    | 8063319                       | 96.04%              | 31.94%                              | FRSPS              | 230918916          | 107712126                    | 7269220                       | 96.44%              | 4.43%                               |
| IT1B             | 218016080          | 99971308                     | 8597021                       | 95.65%              | 0.03%                               | IT1S               | 229874840          | 93869918                     | 18181483                      | 89.58%              | 2.88%                               |
| IT2B             | 231321602          | 106826550                    | 8421056                       | 96.00%              | 0.15%                               | IT2S               | 232671108          | 106902513                    | 8791320                       | 95.67%              | 0.43%                               |
| IT3B             | 232044826          | 107455369                    | 8011698                       | 96.07%              | 0.15%                               | IT3S               | 267844174          | 107522376                    | 7725458                       | 83.17%              | 0.29%                               |
| SPANB            | 231552198          | 104940445                    | 10255824                      | 95.07%              | 0.04%                               | SPANS              | 230214464          | 109452600                    | 5412193                       | 97.44%              | 0.15%                               |
| SPBEB            | 229691642          | 106490925                    | 7934662                       | 96.18%              | 0.04%                               | SPBES              | 227747236          | 106371250                    | 7115742                       | 96.54%              | 0.21%                               |
| USCAB            | 232590868          | 107541877                    | 8099211                       | 95.96%              | 0.15%                               | USCAS              | 230496564          | 109674822                    | 5291049                       | 97.46%              | 0.48%                               |
| USFLB            | 232351870          | 103905927                    | 11198327                      | 94.26%              | 0.12%                               | USFLS              | 229039886          | 108922315                    | 5331644                       | 97.44%              | 0.38%                               |
| USTB             | 209643484          | 95752797                     | 8413088                       | 95.36%              | 0.17%                               | USTS               | 222093020          | 104908607                    | 5866617                       | 97.11%              | 0.10%                               |
|                  |                    |                              |                               |                     |                                     | SAHOS              | 231537168          | 109603066                    | 5888580                       | 97.22%              | 0.05%                               |
|                  |                    |                              |                               |                     |                                     | SAMOS              | 229257850          | 108141439                    | 6167603                       | 97.03%              | 0.33%                               |
|                  |                    |                              |                               |                     |                                     | SANES              | 231536142          | 109648157                    | 5835389                       | 97.23%              | 0.09%                               |

\*, the sickle trimmed reads were mapped to the sweet orange, *Citrus clementina* and Swingle citrumelo genomes using bowtie2 software, and the overall alignment rate was shown here.

**Supplementary Table 5. The assembly status of the 9 sample groups (based on contigs  $\geq 200$  bp)**

| group   | No. of contigs | total length (bp) | Max (bp) | Average (bp) | N50 | Reads utilization rate (%) |
|---------|----------------|-------------------|----------|--------------|-----|----------------------------|
| Group4  | 27,664,602     | 16,035,964,207    | 289,328  | 580          | 599 | 44                         |
| Group9  | 9,704,470      | 6,092,582,093     | 338,689  | 628          | 669 | 46                         |
| Group5  | 21,442,185     | 12,374,648,103    | 384,386  | 577          | 590 | 38                         |
| Group6  | 37,146,365     | 21,562,290,026    | 278,402  | 580          | 608 | 49                         |
| Group7  | 19,333,433     | 11,771,617,595    | 401,613  | 609          | 638 | 48                         |
| Group8  | 29,766,115     | 18,471,561,284    | 403,934  | 621          | 660 | 55                         |
| Group2  | 32,593,522     | 19,131,351,681    | 674,951  | 587          | 625 | 53                         |
| Group1  | 32,393,177     | 19,664,889,472    | 255,355  | 607          | 648 | 54                         |
| Group3  | 13,928,059     | 8,285,509,004     | 147,221  | 595          | 619 | 48                         |
| Average | 24,885,770     | 14,821,157,052    | 352,653  | 598          | 628 | 48                         |
